# Supplementary material for: Conserving Working Rangelands: A Social–Ecological Case Study from Northeastern Colorado
Source: MDPI journal article supplement (doi:10.3390/land10121399), 2021-12-17
Supplement: s1 [file s1]

## Supplementary Material

Table S1. Confusion matrix of the model classifier.

|                        | Water | Developed | Barren | Forest | Shrubland | Herbaceous | Cultivate | Water  | Total   | User's Accuracy (%) |
|------------------------|-------|-----------|--------|--------|-----------|------------|-----------|--------|---------|---------------------|
| Water                  | 4311  | 254       | 53     | 54     | 83        | 76         | 206       | 189    | 5226    | 82.5                |
| Developed              | 127   | 10,245    | 22     | 487    | 1081      | 5485       | 5549      | 325    | 23,321  | 43.9                |
| Barren                 | 65    | 87        | 1404   | 14     | 227       | 235        | 93        | 12     | 2137    | 65.7                |
| Forest                 | 41    | 232       | 1      | 70,677 | 4239      | 211        | 73        | 514    | 759,88  | 93.0                |
| Shrubland              | 86    | 548       | 385    | 3729   | 52,513    | 7963       | 549       | 1565   | 67,338  | 78.0                |
| Herbaceous             | 192   | 3234      | 886    | 917    | 26,931    | 279,259    | 24,750    | 1501   | 337,670 | 82.7                |
| Cultivated             | 88    | 2932      | 39     | 24     | 303       | 20,318     | 92,054    | 2706   | 118,464 | 77.7                |
| Water                  | 247   | 537       | 6      | 950    | 1731      | 1173       | 1963      | 7238   | 13,845  | 52.3                |
| Total                  | 5157  | 18,069    | 2796   | 76,852 | 87,108    | 314,720    | 125,237   | 14,050 | 643,989 |                     |
| Produce's Accuracy (%) | 83.6  | 56.7      | 50.2   | 92.0   | 60.3      | 88.7       | 73.5      | 51.5   |         |                     |

$$\text{Classification Accuracy} = \frac{\text{total number of correction classifications}}{\text{total number of classifications}} \quad (\text{S1})$$

**Table S2.** Statistical evaluations of accuracy of classification outputs for the two study site sites (i.e., the 20-mile buffers around the study communities) compared to the National Land Cover Database (NLCD) classifications.

| Year           | Weld Site    | Larimer Site |
|----------------|--------------|--------------|
| 2001           | 0.889        | 0.745        |
| 2004           | 0.900        | 0.742        |
| 2006           | 0.877        | 0.723        |
| 2008           | 0.871        | 0.748        |
| 2011           | 0.913        | 0.78         |
| 2013           | 0.886        | 0.742        |
| 2016           | 0.904        | 0.75         |
| <b>Overall</b> | <b>0.894</b> | <b>0.747</b> |

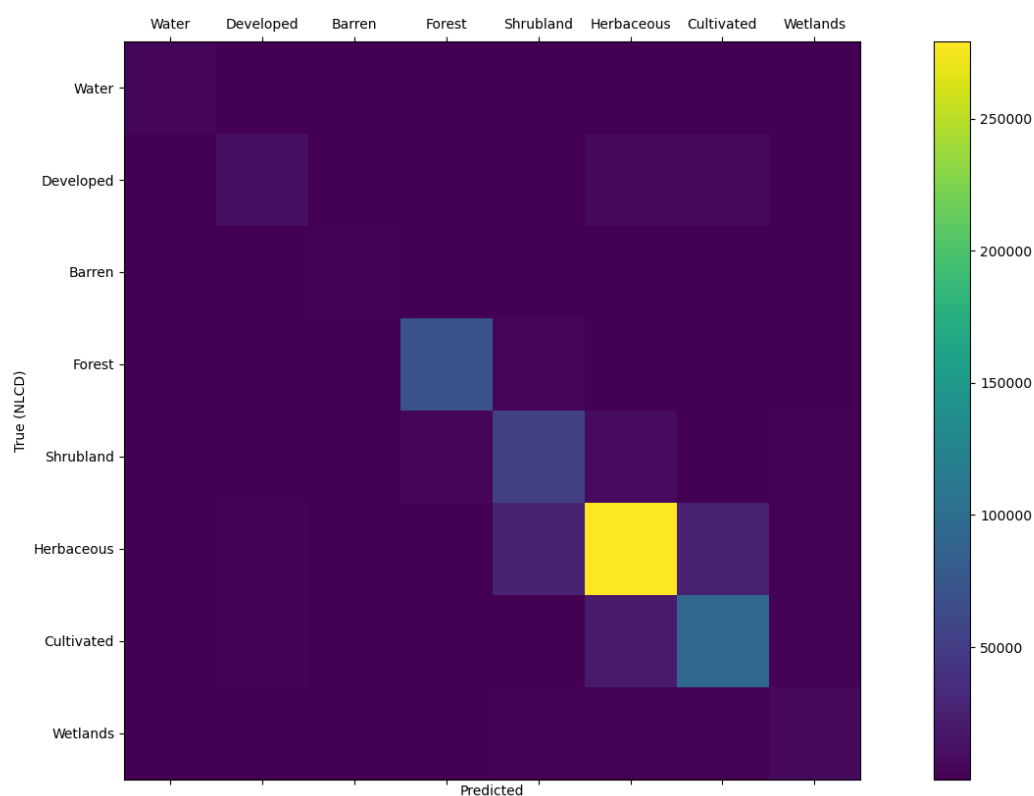

**Figure S1.** Confusion matrix of the model classifier.

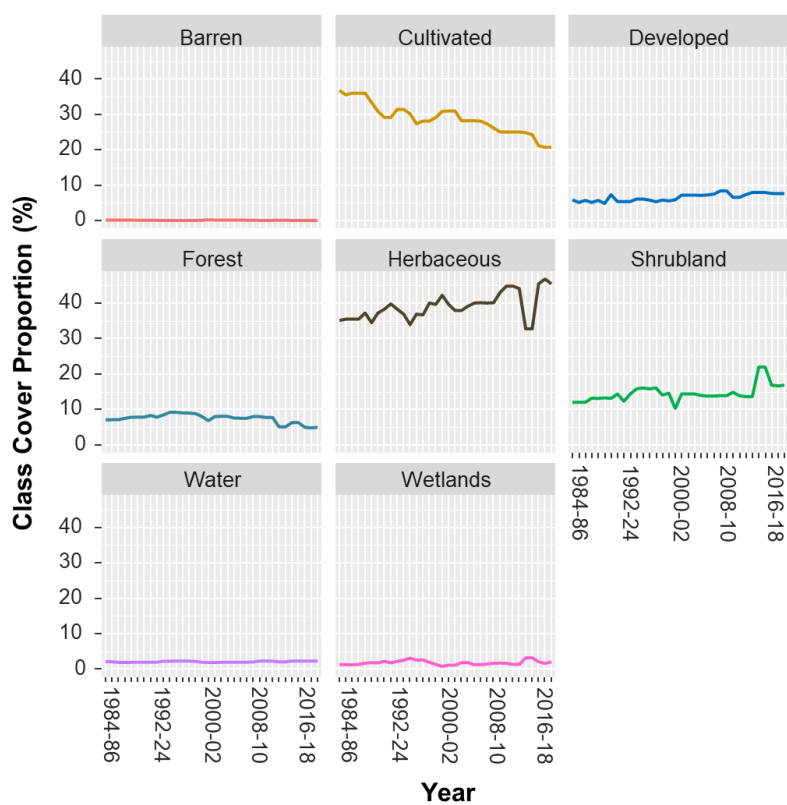

**Figure S2.** Faceted class cover proportion (%) for barren, cultivated, developed, forest, herbaceous, shrubland, water, and wetlands in the northeastern Larimer County, Colorado study site.

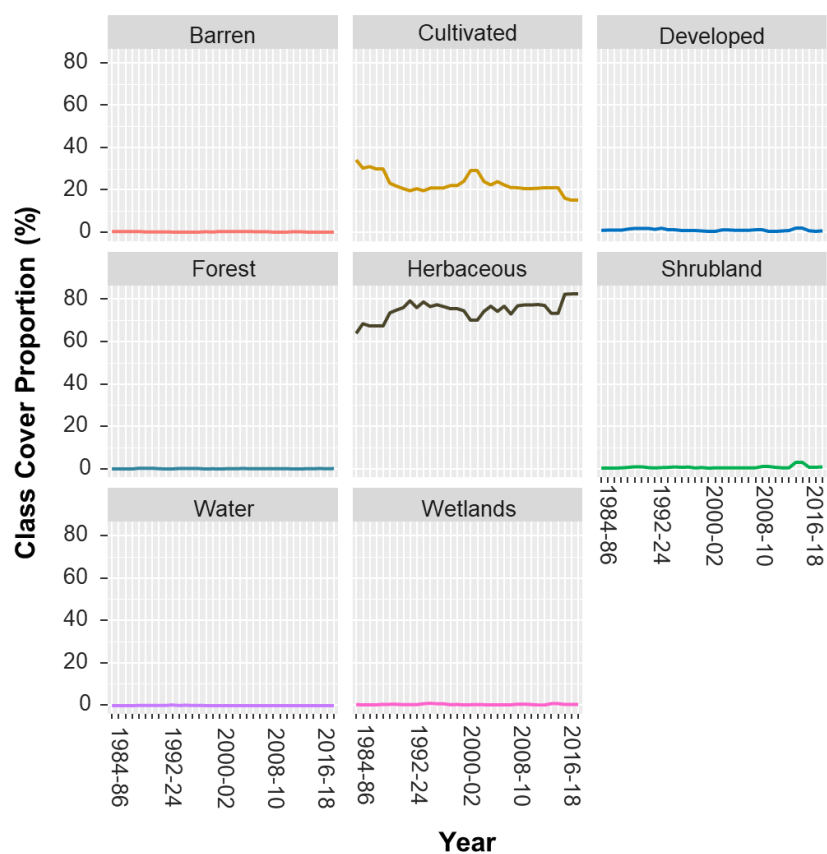

**Figure S3.** Faceted class cover proportion (%) for barren, cultivated, developed, forest, herbaceous, shrubland, water, and wetlands in northcentral Weld County, Colorado study site.
