# Supplementary material for: Conserving Working Rangelands: A Social–Ecological Case Study from Northeastern Colorado
Source: MDPI journal article supplement (doi:10.3390/land10121399), 2021-12-17
Supplement: s1 [file s1]

Archive with 1 entries (1 files):
- land-1430746-supplementary.pdf
